# Supplementary material for: Oxygen-generating Hybrid Polymeric Nanoparticles with Encapsulated Doxorubicin and Chlorin e6 for Trimodal Imaging-Guided Combined Chemo-Photodynamic Therapy
Source: PubMed Central journal article supplement — Theranostics. 2018 Feb 7;8(6):1558–74. doi: 10.7150/thno.22989 (PMC5858167; doi:10.7150/thno.22989), 2018-02-07
Supplement: thnov08p1558s1.pdf [file thnov08p1558s1.pdf]

## SUPPORTING INFORMATION

### **Oxygen-generating Hybrid Polymeric Nanoparticles with Encapsulated Doxorubicin and Chlorin e6 for Trimodal Imaging- Guided Combined Photodynamic-Chemotherapy**

DanRong Hu, LiJuan Chen, Ying Qu, JinRong Peng, BingYang Chu, Kun Shi, Ying

Hao, Lin Zhong, MengYao Wang, ZhiYong Qian\*

*State Key Laboratory of Biotherapy and Cancer Center, West China Hospital, West  
China Medical School, Sichuan University, and Collaborative Innovation Center.  
Chengdu 610041, PR China*

---

\* Corresponding authors. Tel: +86-28-85501986, E-mail address: [anderson-qian@163.com](mailto:anderson-qian@163.com) (Z.Y. Qian).

**Table S1** Properties of PCLA-PEG-PCLA copolymers

| Polymer       | Theoretical molecular weight<br>([DLA]/[CL]/[PEG] <sup>a</sup> | Mn/Da<br>(Theoretical) <sup>a</sup> | [LA]<br>/[CL]/[PEG] <sup>b</sup> | Mn/Da<br>( <sup>1</sup> H NMR) <sup>b</sup> |
|---------------|----------------------------------------------------------------|-------------------------------------|----------------------------------|---------------------------------------------|
| PCLA-PEG-PCLA | 14400/21600/4000                                               | 40000                               | 13744/20221/4000                 | 37965                                       |

<sup>a</sup> Calculated by feed ratio.<sup>b</sup> Calculated by <sup>1</sup>H NMR.**Table S2** Physicochemical characteristics of nanoparticles

| DOX loaded samples   | DLC <sup>a</sup> (%) |     |                  | EE <sup>b</sup> (%) |      |                  | PS <sup>c</sup><br>(nm) | PDI <sup>d</sup> |
|----------------------|----------------------|-----|------------------|---------------------|------|------------------|-------------------------|------------------|
|                      | DOX                  | Ce6 | MnO <sub>2</sub> | DOX                 | Ce6  | MnO <sub>2</sub> |                         |                  |
| blank NPs            | /                    | /   | /                | /                   | /    | /                | 91.9±2.3                | 0.181±0.087      |
| DOX NPs              | 9.9                  | /   | /                | 87.9                | /    | /                | 105.5±0.7               | 0.126±0.077      |
| Ce6 NPs              | /                    | 4.8 | /                | /                   | 99.6 | /                | 98.5±1.3                | 0.156±0.034      |
| MnO <sub>2</sub> NPs | /                    | /   | 2.0              | /                   | /    | 74.0             | 110.4±3.6               | 0.223±0.053      |
| CD NPs               | 10.2                 | 4.7 | /                | 90.8                | 98.7 | /                | 103.5±2.5               | 0.178±0.039      |
| CM NPs               | /                    | 4.8 | 1.9              | /                   | 99.6 | 70.1             | 113.6±2.9               | 0.184±0.062      |
| DM NPs               | 9.4                  | /   | 1.9              | 83.0                | /    | 70.5             | 128.4± 2.2              | 0.194±0.054      |
| CDM NPs              | 9.5                  | 4.7 | 1.8              | 83.8                | 98.7 | 66.6             | 123.6±2.9               | 0.204±0.049      |

<sup>a</sup> Drug loading content of DOX (1<sup>st</sup> line), Ce6 (2<sup>nd</sup> line) and/or MnO<sub>2</sub> (3<sup>rd</sup> line).<sup>b</sup> Encapsulated efficiency of DOX (1<sup>st</sup> line), Ce6 (2<sup>nd</sup> line) and/or MnO<sub>2</sub> (3<sup>rd</sup> line).<sup>c</sup> Mean diameter of nanoparticles determined by dynamic light scattering.<sup>d</sup> Polydispersity index (PDI) of nanoparticles size.**Table S3** Pharmacokinetic parameters of free DOX, DOX NPs, CD NPs and CDM NPs in rat after i.v. injection.

| Parameters                     | free DOX  | DOX NPs    | CD NPs     | CDM NPs     |
|--------------------------------|-----------|------------|------------|-------------|
| C <sub>max</sub> (µg/mL)       | 4.0 ± 0.4 | 69.6 ± 5.4 | 80.4 ± 3.5 | 115.6 ± 3.8 |
| T <sub>1/2α</sub> (h)          | 0.06±0.01 | 0.10±0.02  | 0.12±0.04  | 0.10±0.02   |
| AUC <sub>(0-t)</sub> (µg/mL·h) | 7.6±0.7   | 80.7±3.5   | 76.4±9.2   | 102.0±14.5  |

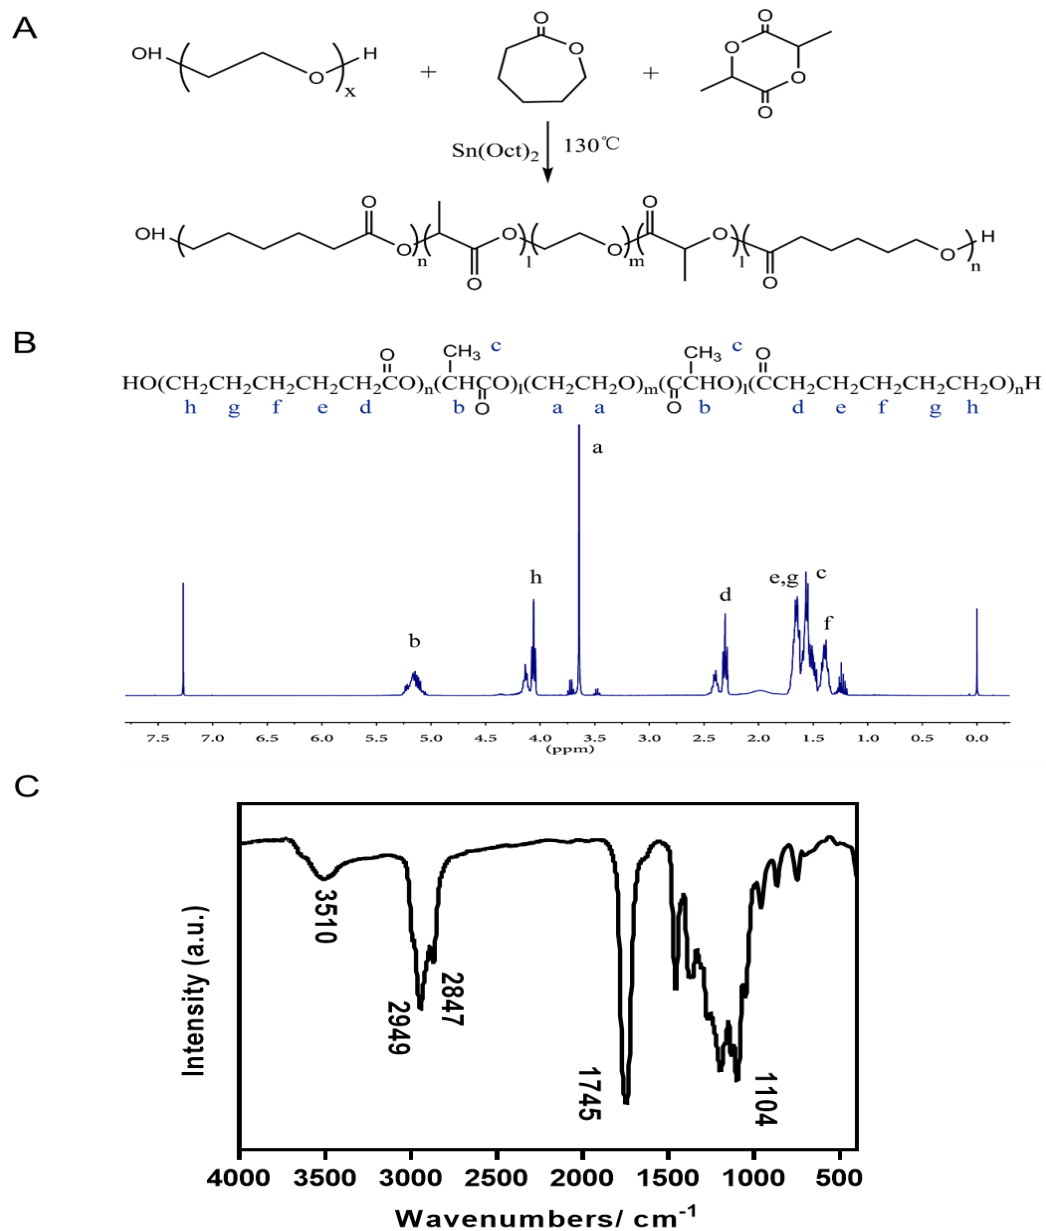

**Figure S1** (A) Synthesis scheme of PCLA-PEG-PCLA copolymers. (B) Representative  $^1\text{H}$ -NMR spectrum (400 MHz) of PCLA-PEG-PCLA copolymer in  $\text{CDCl}_3$ . (C) FT-IR spectrum of PCLA-PEG-PCLA copolymer.

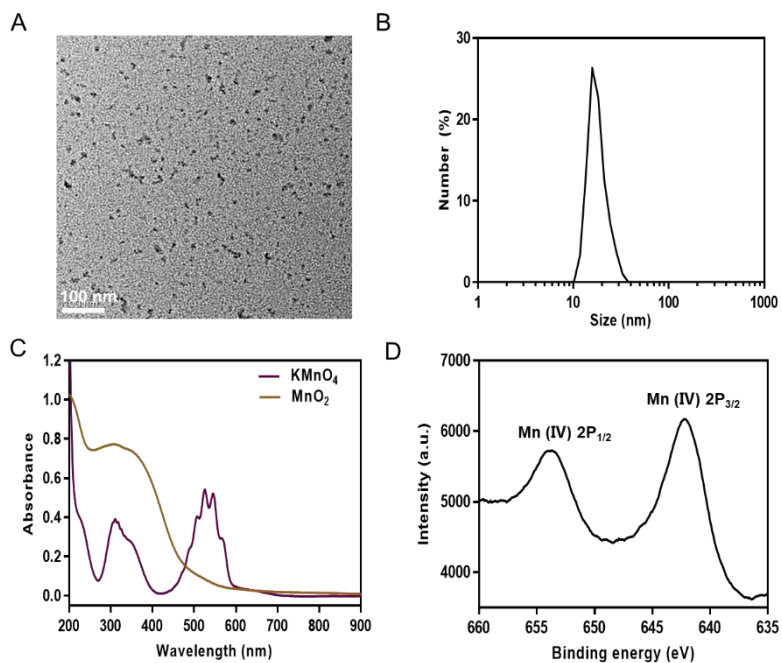

**Figure S2** Characterization of colloidal MnO<sub>2</sub>. (A) TEM image. Colloidal MnO<sub>2</sub> (~15 nm) were stabilized by positively charged PAH. (B) Size distribution measured by dynamic light scattering (DLS). (C) UV-vis absorption spectra of KMnO<sub>4</sub> and colloidal MnO<sub>2</sub>. After the reaction with PAH, the KMnO<sub>4</sub> peaks (315, 525 and 545 nm) disappeared, and a new broad peak around 300 nm-400nm appeared, an indicator of the formation of colloidal MnO<sub>2</sub>. (D) X-ray photoelectron spectroscopy (XPS) spectrum of MnO<sub>2</sub>. As is evident, Mn (IV) 2P<sub>3/2</sub> and Mn (IV) 2P<sub>1/2</sub> peak are centered at about 642.3 eV and 653.7 eV, with a spin-energy separation of 11.7 eV, which confirms the formation of Mn (IV)O<sub>2</sub>.

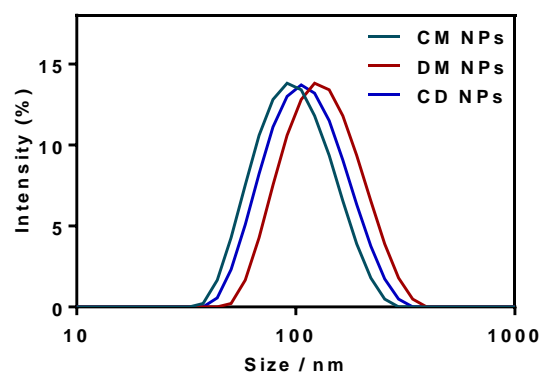

**Figure S3** Size distribution of CM NPs, DM NPs and CD NPs measured by dynamic light scattering (DLS).

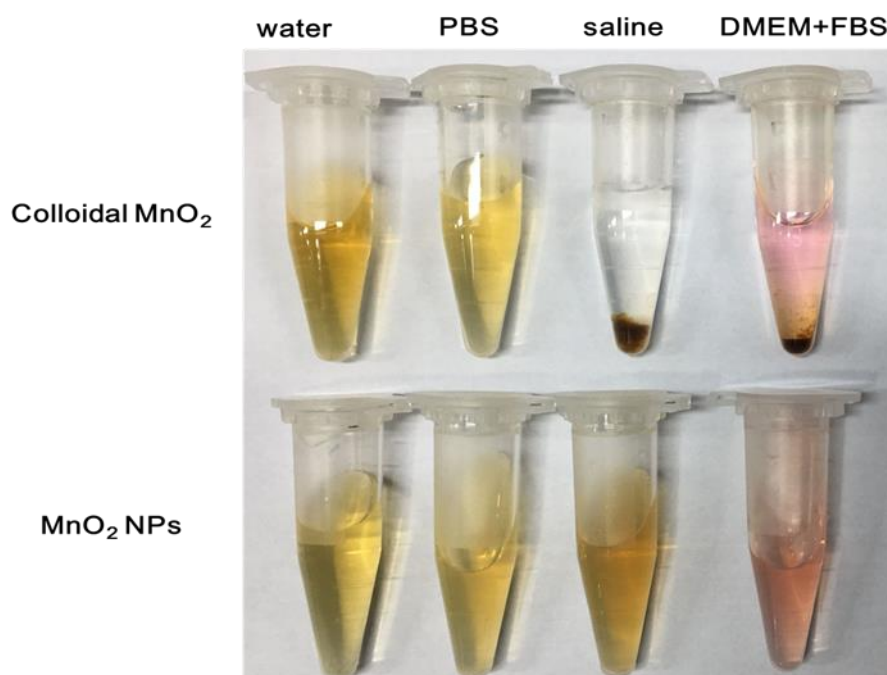

**Figure S4** Picture of colloidal MnO<sub>2</sub> and MnO<sub>2</sub> NPs in various aqueous media: water, PBS (pH 7.4, 0.1 M), normal saline (0.9% NaCl) and DMEM cell medium containing 50% fetal bovine serum (FBS). Colloidal MnO<sub>2</sub> undergo aggregation in saline or cell culture medium, while MnO<sub>2</sub> NPs are stable in these media.

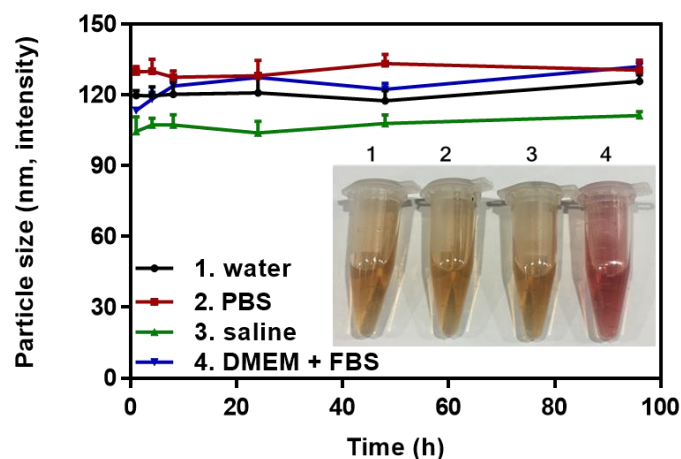

**Figure S5** The size stability of CDM NPs in various aqueous media: water, PBS (pH 7.4, 0.1 M), normal saline (0.9% NaCl) and DMEM cell medium containing 50% fetal bovine serum (FBS). The insert shows picture of CDM NPs in various media after 15-days incubation.

A

neutral conditions (pH 7.4):

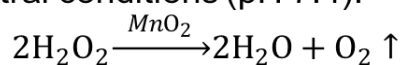

B

acidic conditions (pH 6.5):

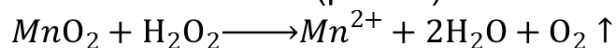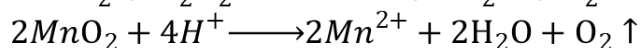

**Figure S6** The equations of redox reaction between  $\text{MnO}_2$  and  $\text{H}_2\text{O}_2$  in (A) neutral solutions (pH = 7.4) and (B) acidic solutions (pH = 6.5).

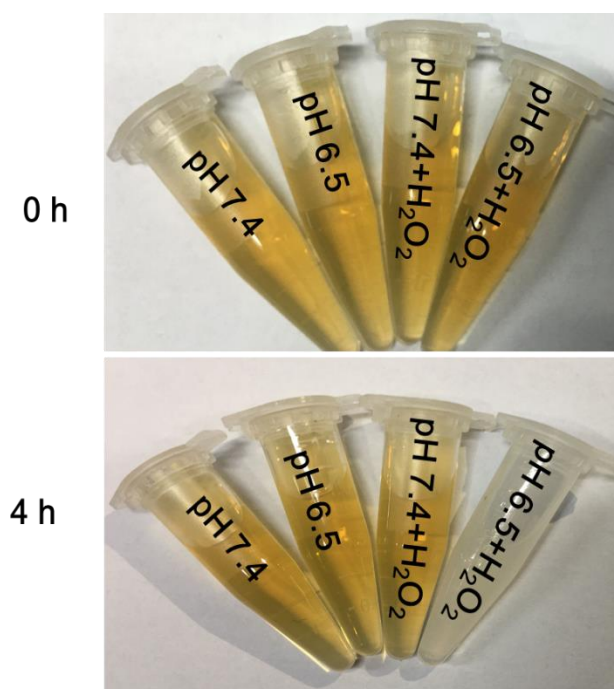

**Figure S7** Degradation photos of MnO<sub>2</sub> NPs dispersed in pH 7.4 or pH 6.5 PBS with or without H<sub>2</sub>O<sub>2</sub> at 0 h and 4 h. MnO<sub>2</sub> in nanoparticles degraded rapidly under pH 6.5 in the presence of H<sub>2</sub>O<sub>2</sub>, and almost all MnO<sub>2</sub> converted to colorless Mn<sup>2+</sup> ions in 4 h. In contrast, MnO<sub>2</sub> appeared to show limited change in other conditions.

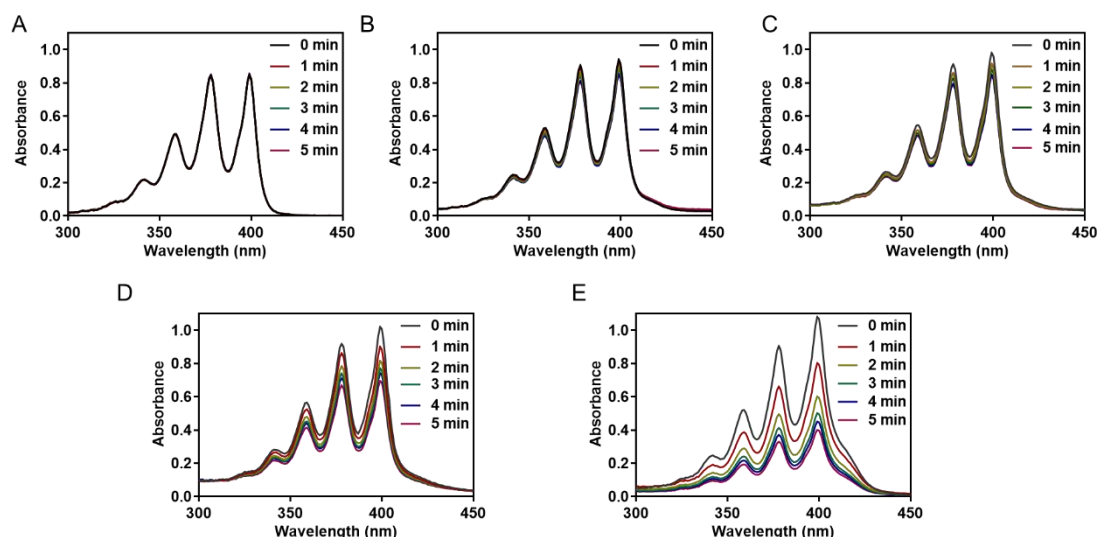

**Figure S8** UV-vis absorption spectra of ABDA in different samples at designated time ( $t = 0-5$  min) irradiation of laser ( $\lambda = 660$  nm) with the power density =  $100 \text{ mW/cm}^2$ : (A) PBS 6.5; (B) free Ce6 in PBS 6.5; (C) Ce6 NPs in PBS 6.5; (D) CM NPs in PBS 7.4; (E) CM NPs in PBS 6.5. All samples were at the same Ce6 concentration and 30% H<sub>2</sub>O<sub>2</sub> solutions were added to maintain the final concentration of H<sub>2</sub>O<sub>2</sub> at  $100 \mu\text{M}$ .

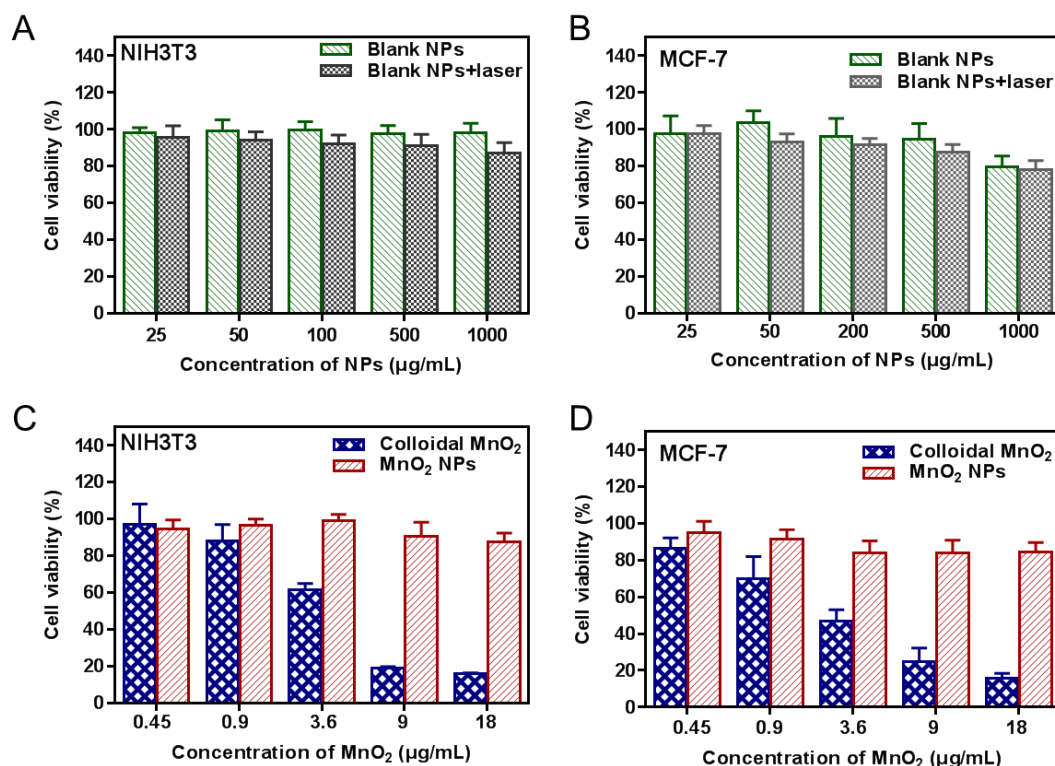

**Figure S9** Relative viabilities of NIH 3T3 and MCF-7 cells after incubation with various concentrations of blank NPs, blank NPs with laser irradiation, colloidal  $\text{MnO}_2$  and  $\text{MnO}_2$  NPs for 24 h.

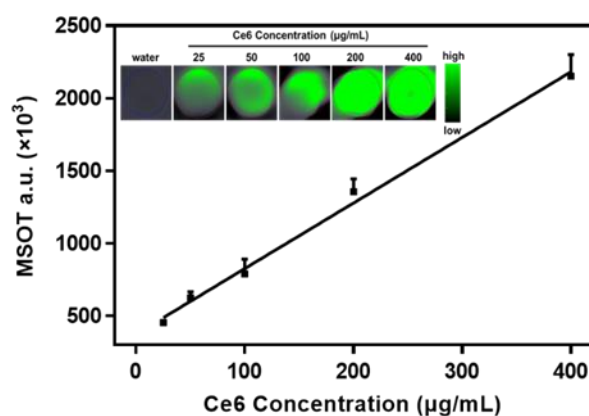

**Figure S10** Linear correlation of PA signals of Ce6 in CDM NPs against its corresponding concentrations. Inserted is PA imaging of CDM NPs at indicated Ce6 concentrations (680 nm).

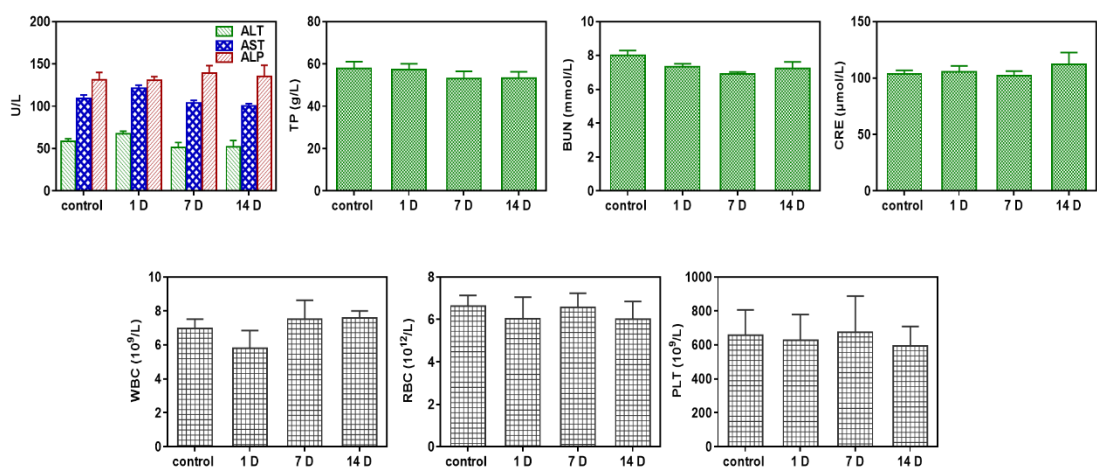

**Figure S11** Blood biochemistry and hematology data of female Balb/c mice treated with MnO<sub>2</sub> NPs at the dose of 5 mg/kg at 1, 7, and 14-days post-injection. The examined parameters included alkaline phosphatase (ALP), aminotransferase (ALT), aminotransferase (AST), total protein (TP), blood urea nitrogen (BUN), creatinine (CRE), white blood cell (WBC) counts, red blood cell (RBC) counts and platelets (PLT). All parameters were close to those of the control healthy mice and within the normal reference ranges. Statistics are based on three mice per data point.

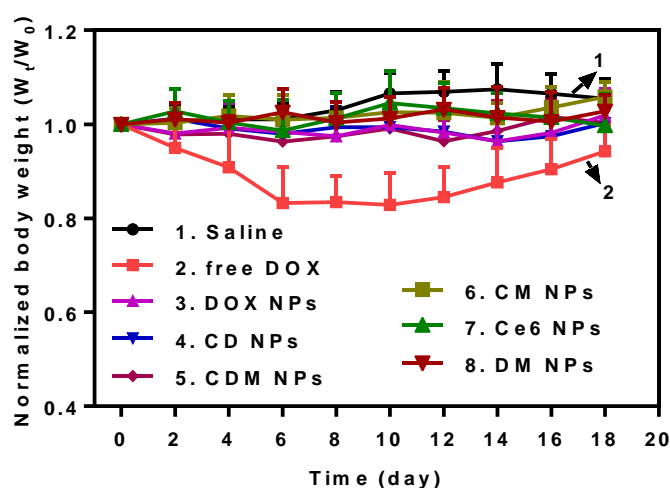

**Figure S12** Normalized body weight of mice bearing MCF-7 tumors after various treatments as indicated. Error bars represent SD (n = 5).

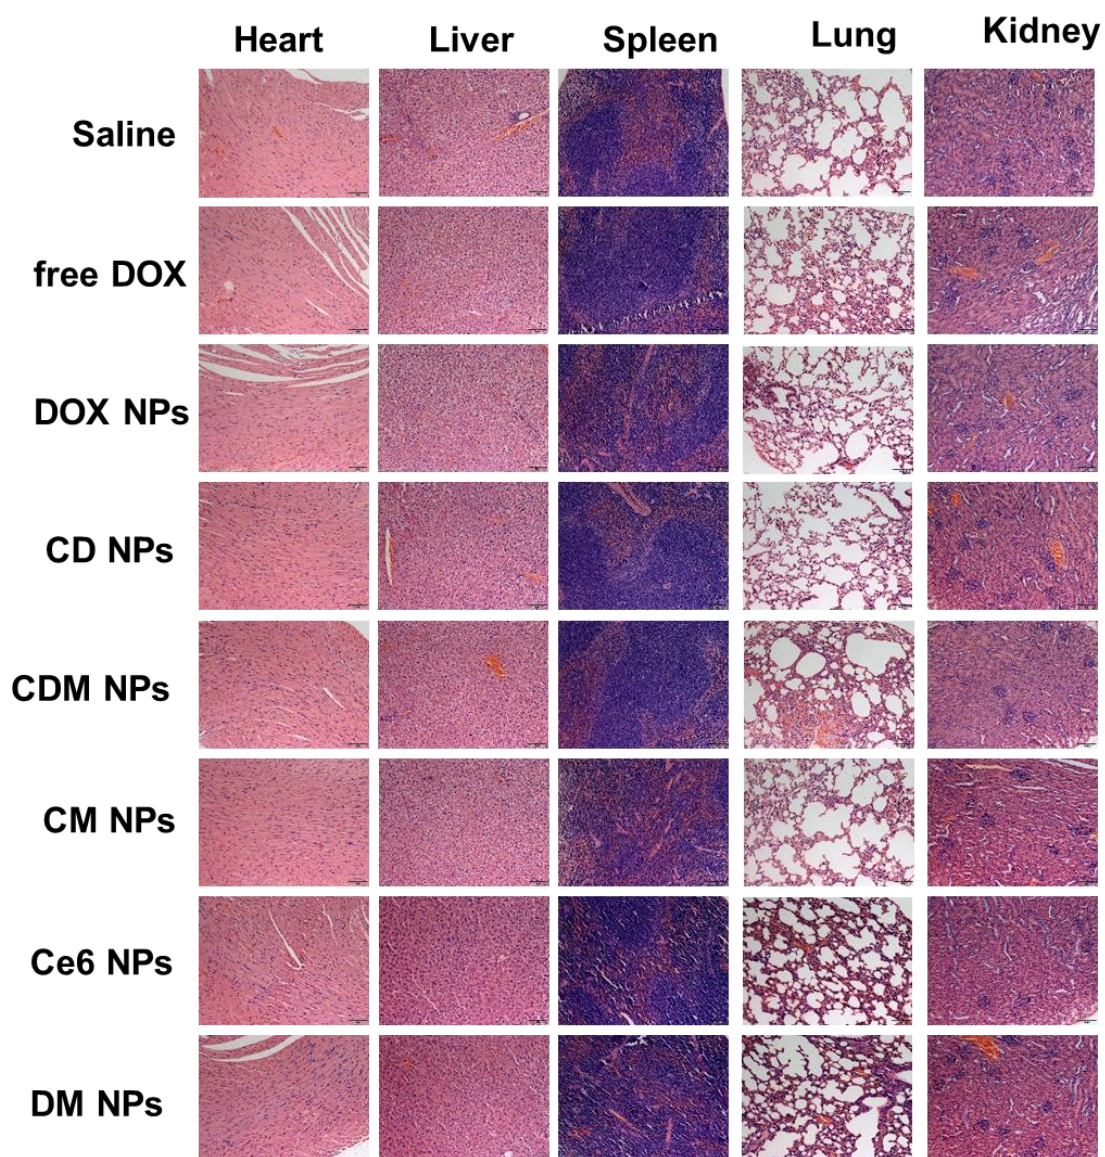

**Figure S13** Representative H&E stained images of major organs including heart, liver, spleen, lung and kidney collected from the untreated mice and mice treated with various formulations at 18-days post-injection. Images were acquired at  $200\times$  magnification. No obvious organ damage or lesion was observed for CDM NPs treated mice.
